# Supplementary material
Source: PubMed Central journal article supplement (PMC3496202)
Supplement: supp_1103179_11-03179_S1-4.pdf [file supp_1103179_11-03179_S1-4.pdf]

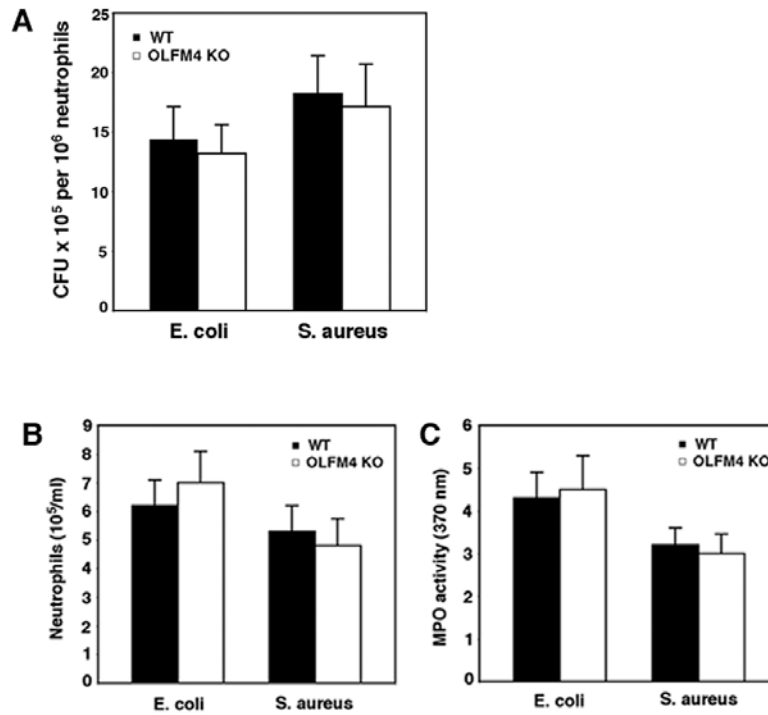

Supplementary Figure 1 Liu et al.

**SUPPLEMENTAL FIGURE 1.** Bacterial binding to neutrophils and neutrophil recruitment to peritoneal cavity after bacterial challenge is not affected by OLFM4 deletion. Neutrophils ( $10^6$ ) derived from the bone marrow of wild-type (WT) or *OLFM4*<sup>-/-</sup> (OLFM4 KO) mice were incubated with *E. coli* ( $10^7$ ) or *S. aureus* ( $10^7$ ) in a 24-well plate. After 15 min, the bacteria that were not associated with neutrophils were gently washed off. The remaining bacteria were counted on tryptic soy agar plates. Data are expressed as mean  $\pm$  s.d. (n=4) (A). Wild-type (WT) or *OLFM4*<sup>-/-</sup> (OLFM4 KO) mice were challenged i.p. with *E. coli* ( $5 \times 10^3$ ) or *S. aureus* ( $5 \times 10^4$ ). After 2 h, the peritoneal cavity was lavaged with 5 ml PBS and neutrophils counted (B) and MPO activity assessed (C). Data are expressed as mean  $\pm$  s.d. (n=3).

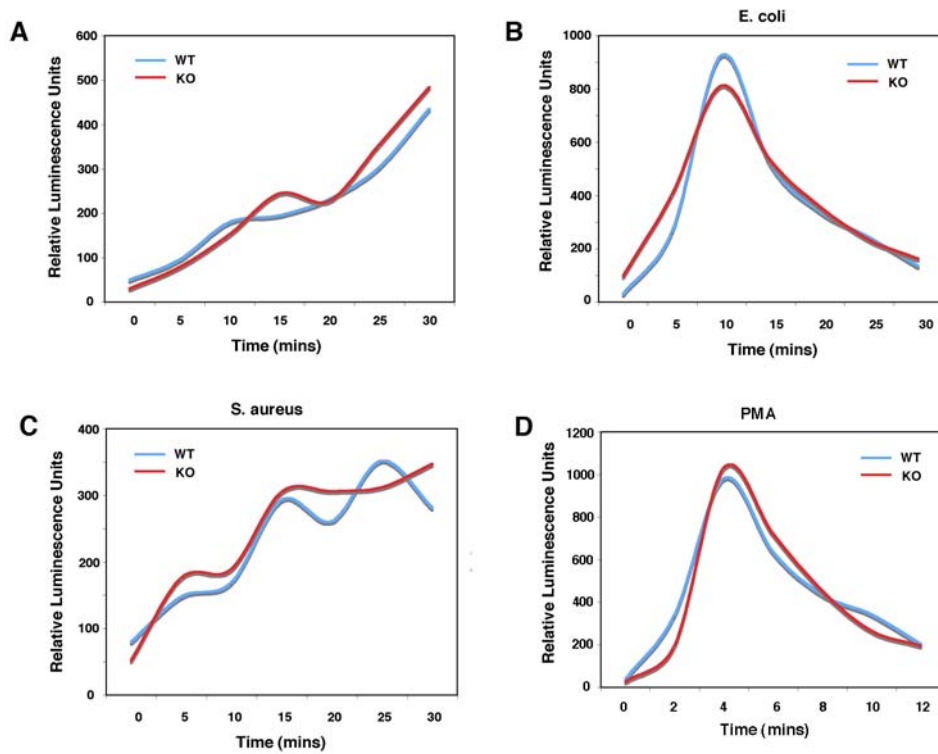

Supplementary Figure 2 Liu et al.

**SUPPLEMENTAL FIGURE 2.** Neutrophil NADPH oxidase-mediated respiratory burst is not affected by OLFM4 deletion. Neutrophils ( $5 \times 10^5$ ) derived from the bone marrow of wild-type (WT) or *OLFM4*<sup>-/-</sup> (*OLFM4* KO) mice were treated *in vitro* without (A) or with *E. coli* ( $10^7$ ) (B), or *S. aureus* ( $10^7$ ) (C), or PMA (100 ng/ml) (D). Superoxide ( $O_2^-$ ) production was analyzed using Diogenes reagent as described in methods. A representative experimental result is presented. Similar results were observed in at least two other experiments.

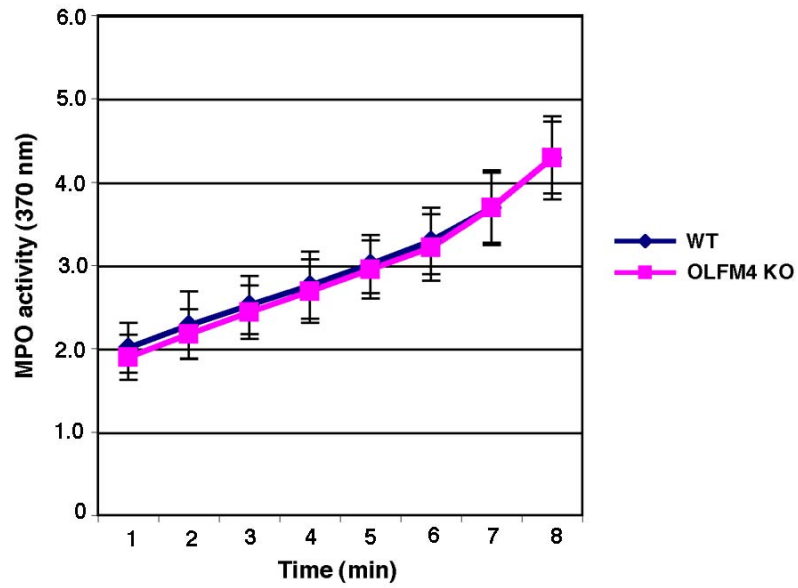

**Supplementary Figure 3 Liu et al.**

**SUPPLEMENTAL FIGURE 3.** Neutrophil MPO activity is not affected by OLFM4 deletion. MPO activity in neutrophils derived from the bone marrow of wild-type (WT) or *OLFM4*<sup>-/-</sup> (OLFM4 KO) mice was analyzed over time. Data are expressed as mean  $\pm$  s.d. (n=3).

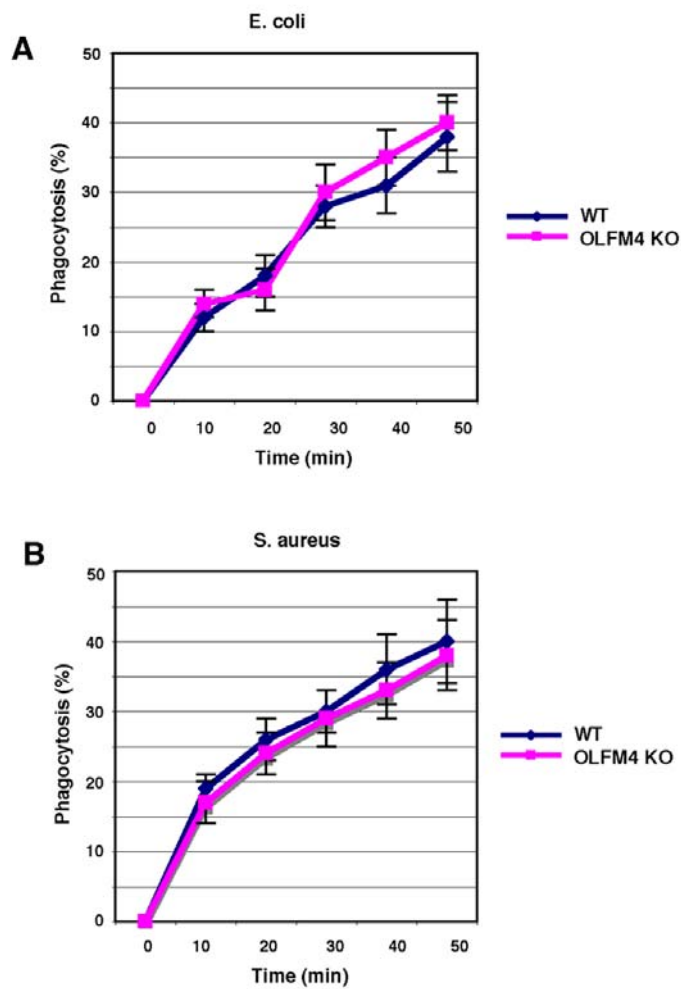

**Supplementary Figure 4 Liu et al.**

**SUPPLEMENTAL FIGURE 4.** Neutrophil phagocytosis of *E. coli* and *S. aureus* is not affected by OLFM4 deletion. Opsonized fluorescent *E. coli* ( $10^7$ ) (A) or *S. aureus* ( $10^7$ ) (B) particles were incubated with neutrophils ( $10^6$ ) derived from the bone marrow of wild-type (WT) or *OLF4*<sup>-/-</sup> (OLF4 KO) mice (MOI=10) for the time period indicated. The percentage of phagocytosis was determined by the flow cytometry. Data are expressed as mean  $\pm$  s.d. (n=3).
